# Supplementary material
Source: PubMed Central journal article supplement (PMC4740227)
Supplement: NIHMS738919-supplement-1.pdf [file NIHMS738919-supplement-1.pdf]

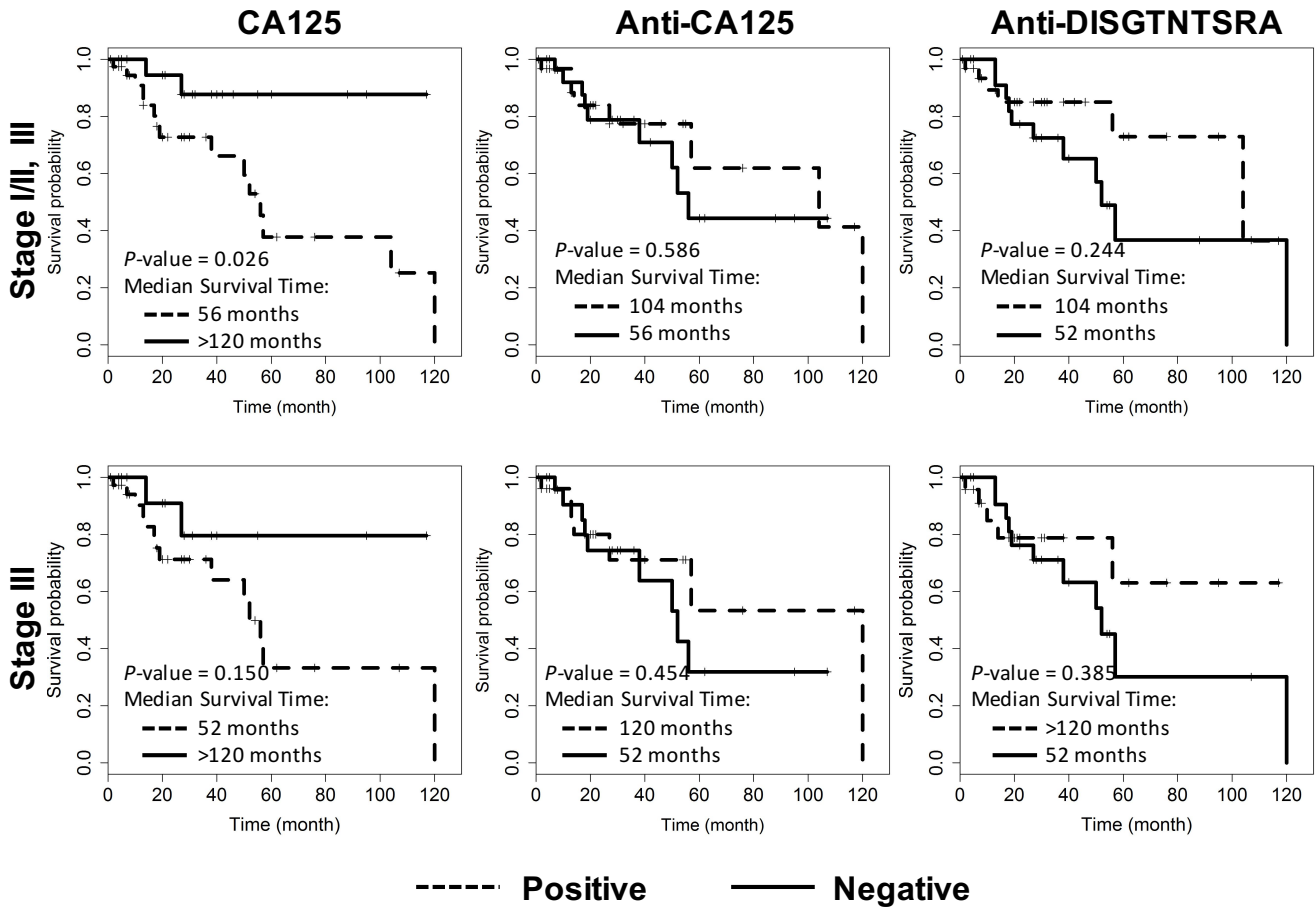

**Supplemental Figure 2. OvCa patient survival based on CA125, anti-CA125, and anti-DISGTNTSRA status at time of diagnosis.** Patients with survival data (Stage I/II  $n=9$ , Stage III  $n=50$ ) were divided into groups based on CA125 (normal  $< 35$  IU/mL, elevated  $>35$  IU/mL), anti-CA125 (median cutoff), and anti-DISGTNTSRA (median cutoff). Kaplan-Meier survival curves were generated using all patients or Stage III patients only.  $P$ -values are reported for Log-rank test and median survival times are indicated.
