# Supplementary material
Source: PubMed Central journal article supplement (PMC4740227)
Supplement: NIHMS738919-supplement-4.pdf [file NIHMS738919-supplement-4.pdf]

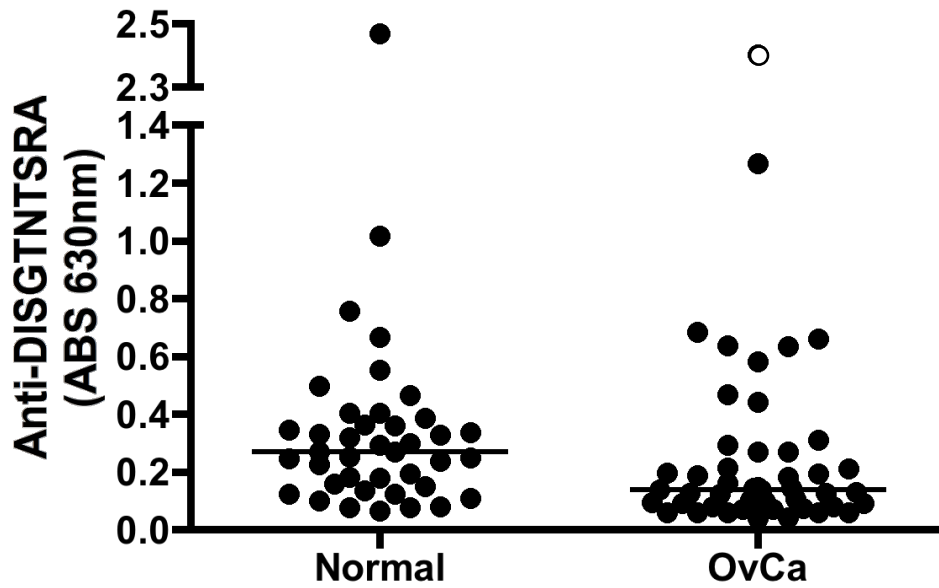

**Supplemental Figure 1.** OvCa and normal plasma reactivity to DISGTNTSRA by ELISA. OvCa patient (n=47) and normal (n=40) plasma samples were assessed for anti-DISGTNTSRA antibodies by ELISA. Lines represent median of each group. \**P*-value = 0.0058 by Mann-Whitney test. The open circle indicates patient sample DM778 that was used in identifying DISGTNTSRA peptide (see Table 1).
